# Supplementary material for: Adverse events and tolerability of long-term suppressive antibiotic therapy for periprosthetic joint infection: a prospective cohort study
Source: Copernicus journal article supplement (doi:10.5194/jbji-11-267-2026), 2026-05-12
Supplement: Supplementary file 1 [file JBJI_Supplement_S1_Tables.pdf › JBJI_Supplement_S1_Tables.pdf]

**Supplement S1**

**Table S1.** Definitions of adverse events

| Non-serious adverse event         | Definition                                                                                                                                                    |
|-----------------------------------|---------------------------------------------------------------------------------------------------------------------------------------------------------------|
| <i>C. difficile</i> infection     | Clinical signs and symptoms consistent with a <i>C. difficile</i> infection in the setting of a positive <i>C. difficile</i> toxin PCR test result from stool |
| Anemia                            | Hemoglobin level < 10 g/dL at least 10 days after last surgery                                                                                                |
| Leukopenia                        | White blood cell count < 4500 leukocytes/L                                                                                                                    |
| Thrombocytopenia                  | Platelet count < 150.000/L                                                                                                                                    |
| Renal failure                     | Increase in serum creatinine level > 1.5 time the patients' baseline                                                                                          |
| Hepatitis                         | Increase in aspartate transaminase or alanine transaminase level > 3 times the patients' baseline                                                             |
| Changes in weight                 | Patients' subjective impression of losing or gaining weight during the time of antibiotic treatment                                                           |
| Changes in electrocardiogram      | Prolonged QTc-time; > 550 ms                                                                                                                                  |
| Serious adverse event             | Definition                                                                                                                                                    |
| Inpatient hospitalization         | Any initial admission to a hospital or equivalent health care facility, even if for less than 24 hours; any prolongation of an existing admission             |
| Life-threatening                  | AE which places the patient at immediate risk of death at the time of the event                                                                               |
| Significant disability/incapacity | A substantial disruption of a person's ability to conduct normal life functions                                                                               |
| Death                             | Death related to SAT                                                                                                                                          |

**Table S2.** Frequency of AE stratified by the involved organ systems

| Organ system                          | n (%) <sup>1</sup> | Adverse Events                                | n (%) <sup>2</sup> |
|---------------------------------------|--------------------|-----------------------------------------------|--------------------|
| Gastrointestinal tract                | 63 (42)            | Diarrhea                                      | 12 (19)            |
|                                       |                    | Reflux                                        | 8 (13)             |
|                                       |                    | Nausea                                        | 8 (13)             |
|                                       |                    | Inappetence                                   | 7(11)              |
|                                       |                    | Dry mouth                                     | 5 (8)              |
|                                       |                    | Dysgeusia                                     | 5 (8)              |
|                                       |                    | Constipation                                  | 4 (6)              |
|                                       |                    | <i>Clostridioides difficile</i> enterocolitis | 4 (6)              |
|                                       |                    | Vomiting                                      | 3 (5)              |
|                                       |                    | Meteorism                                     | 3 (5)              |
|                                       |                    | Malaise                                       | 2 (3)              |
| Skin and skin appendages              | 35 (23)            | Change in color or texture of the tongue      | 2 (3)              |
|                                       |                    | Skin rash                                     | 10 (29)            |
|                                       |                    | Pruritus                                      | 8 (23)             |
|                                       |                    | Dry skin                                      | 7 (20)             |
|                                       |                    | Candida mucositis (oral and genital)          | 5 (14)             |
|                                       |                    | Skin swelling                                 | 3 (9)              |
|                                       |                    | Changes in hair or nails                      | 1 (3)              |
| Peripheral and central nervous system | 25 (17)            | Photosensitivity                              | 1(3)               |
|                                       |                    | Fatigue                                       | 4 (16)             |
|                                       |                    | Neuropathy, paresthesia                       | 4 (16)             |
|                                       |                    | Symptoms of depression                        | 4 (16)             |
|                                       |                    | Vertigo                                       | 3 (12)             |
|                                       |                    | Visual problems                               | 3 (12)             |
|                                       |                    | Headache                                      | 3 (12)             |
|                                       |                    | Memory issues                                 | 3 (12)             |
| Kidney                                | 6 (4)              | Dizziness                                     | 1 (4)              |
| Bone marrow/blood                     | 5 (3)              | Renal failure                                 | 6 (100)            |
|                                       |                    | Anemia                                        | 4 (80)             |
| Liver                                 | 3 (2)              | Leukopenia                                    | 1 (20)             |
|                                       |                    | Hepatitis                                     | 3 (100)            |
| Other                                 | 12 (8)             | Weight gain                                   | 4 (33)             |
|                                       |                    | Weight loss                                   | 3 (25)             |
|                                       |                    | Myalgia and/or arthralgia                     | 3 (25)             |
|                                       |                    | Dyspnea                                       | 1 (8)              |
|                                       |                    | Changes in electrocardiogram (long QTc)       | 1 (8)              |

<sup>1</sup> refer to number of all adverse events (n=149)

10 <sup>2</sup> refer to number of AE within the organ system

**Table S3.** Frequency of AE stratified according to sex, age, BMI and antibiotic used for SAT

| Organ system                                         |               |             | p-value | Age < 65    | Age ≥ 65     | p-value | BMI < 25                 | BMI ≥ 25                 | p-value | Amoxicillin | Doxycycline | Cotrimoxazole | p-value |
|------------------------------------------------------|---------------|-------------|---------|-------------|--------------|---------|--------------------------|--------------------------|---------|-------------|-------------|---------------|---------|
|                                                      | Female (n=15) | Male (n=15) |         | years (n=7) | years (n=23) |         | kg/m <sup>2</sup> (n=13) | kg/m <sup>2</sup> (n=17) |         | (n=15)      | (n=9)       | (n=6)         |         |
| <b>Gastrointestinal tract (n = 63)</b>               | 28 (45)       | 35 (55)     | 0.431   | 15 (24)     | 48 (76)      | 0.562   | 24 (38)                  | 39 (62)                  | 0.355   | 23 (37)     | 26 (41)     | 9 (14)        | 0.615   |
| <b>Skin and skin appendages (n = 35)</b>             | 14 (40)       | 21 (60)     | 0.316   | 5 (14)      | 30 (86)      | 0.129   | 9 (26)                   | 26 (74)                  | 0.068   | 14 (40)     | 14 (40)     | 6 (17)        | 0.941   |
| <b>Bone marrow and blood (n = 5)</b>                 | 2 (40)        | 3 (60)      | 0.777   | 0           | 5 (100)      | 0.184   | 2 (40)                   | 3 (60)                   | 0.871   | 2 (40)      | 2 (40)      | 1 (20)        | 0.847   |
| <b>Liver (n = 3)</b>                                 | 1 (33)        | 2 (67)      | 0.550   | 1 (33)      | 2 (67)       | 0.671   | 0                        | 3 (100)                  | 0.116   | 1 (33)      | 0           | 2 (67)        | 0.055   |
| <b>Kidney (n = 6)</b>                                | 1 (17)        | 5 (83)      | 0.073   | 1 (17)      | 5 (83)       | 0.671   | 1 (17)                   | 5 (83)                   | 0.147   | 2 (33)      | 1 (17)      | 3 (50)        | 0.033   |
| <b>Peripheral or central nervous system (n = 25)</b> | 8 (32)        | 17 (68)     | 0.206   | 3 (12)      | 22 (88)      | 0.586   | 7 (28)                   | 18 (72)                  | 0.377   | 14 (56)     | 7 (28)      | 4 (16)        | 0.254   |
| <b>Other<sup>1</sup> (n = 12)</b>                    | 3 (25)        | 9 (75)      | 0.334   | 2 (17)      | 10 (83)      | 0.506   | 3 (25)                   | 9 (75)                   | 0.588   | 9 (75)      | 2 (17)      | 1 (8)         | 0.256   |
| <b>All adverse events (n = 145)</b>                  | 57 (38)       | 92 (62)     | 0.241   | 27 (18)     | 122 (82)     | 0.536   | 46 (31)                  | 103 (69)                 | 0.054   | 65 (44)     | 52 (35)     | 26 (17)       | 0.976   |

Data are shown as number of AEs (%) within this group.

BMI, body mass index

<sup>1</sup> weight gain, weight loss, myalgia and/or arthralgia, dyspnea, changes in electrocardiogram (long QTc)
