# Supplementary material for: Adverse events and tolerability of long-term suppressive antibiotic therapy for periprosthetic joint infection: a prospective cohort study
Source: Copernicus journal article supplement (doi:10.5194/jbji-11-267-2026), 2026-05-12
Supplement: Supplementary file 2 [file JBJI_Supplement_S2_Questionnaire.pdf › JBJI_Supplement_S2_Questionnaire.pdf]

**Supplement S2**  
Study Questionnaire

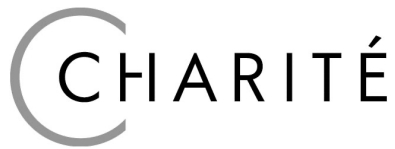

## Charité Centrum für Orthopädie und Unfallchirurgie

Charité | Centrum für Muskuloskeletale Chirurgie  
Campus Virchow-Klinikum | Augustenburger Platz 1 | 13353 Berlin

### Centrum für Muskuloskeletale Chirurgie

Ärztlicher Direktor: Univ.-Prof. Dr. med. Carsten Perka  
Geschäftsführender Direktor: Univ.-Prof. Dr. med. Ulrich Stöckle

Campus Virchow-Klinikum, Augustenburger Platz 1, 13353 Berlin  
Service-Hotline: Tel. +49 30 450 552 688, Fax +49 30 450 755 2977  
Privatsprechstunde: Tel. +49 30 450 552 032, Fax +49 30 450 552 901  
E-Mail: [cmsc-virchow@charite.de](mailto:cmsc-virchow@charite.de)  
Web: [cmsc.charite.de](http://cmsc.charite.de)

### **Patientenfragebogen - Unerwünschte Arzneimittelwirkungen während der Langzeitantibiotikatherapie**

---

Name

Vorname

Patientennummer

Sind Sie sich vor Beginn der Therapie bewusst darüber gewesen, welche Nebenwirkungen auftreten könnten?

Ja      Nein

☐      ☐

Sind Ihnen während der Therapie Veränderungen aufgefallen, die Sie in Zusammenhang mit der Antibiotikatherapie bringen?

Ja      Nein

☐      ☐

Hatte die Therapie Auswirkungen auf bereits bestehende Vorerkrankungen?  
Wenn Ja, welche?

Ja      Nein

☐      ☐

Wurde die Therapie aufgrund von Nebenwirkungen unterbrochen?  
Wenn Ja, wie lange?

Ja      Nein  
☐    ☐

---

Welche weiteren Maßnahmen wurden ergriffen, um die Nebenwirkungen zu behandeln?

---

Ergab sich danach eine Besserung?

Ja      Nein  
☐    ☐

Wie haben Sie die Therapie im Allgemeinen vertragen?

|                                        |   |   |   |   |                                      |   |   |   |   |    |
|----------------------------------------|---|---|---|---|--------------------------------------|---|---|---|---|----|
| 0                                      | 1 | 2 | 3 | 4 | 5                                    | 6 | 7 | 8 | 9 | 10 |
| Therapie<br>abgebrochen/<br>umgestellt |   |   |   |   | Sehr gut<br>Keinerlei<br>Beschwerden |   |   |   |   |    |

Wie stark hat Sie die Therapie in Ihrem Alltag eingeschränkt?

---

Sehr stark      stark      teils teils      wenig      gar nicht

Hatten Sie nach Beginn bzw. Ende der antibiotischen Therapie einen weiteren ungeplanten Krankenhausaufenthalt im Rahmen der Therapie des entzündeten Gelenkes und gab es weitere Operationen?

---

| Organsystem                           | Nebenwirkung                                             | Nein                     | Ja                       | Anmerkungen |
|---------------------------------------|----------------------------------------------------------|--------------------------|--------------------------|-------------|
| Gastrointestinal/<br>Magen Darm Trakt | Durchfall                                                | <input type="checkbox"/> | <input type="checkbox"/> |             |
|                                       | Übelkeit                                                 | <input type="checkbox"/> | <input type="checkbox"/> |             |
|                                       | Erbrechen                                                | <input type="checkbox"/> | <input type="checkbox"/> |             |
|                                       | <i>Clostridium difficile</i> Enterokolitis               | <input type="checkbox"/> | <input type="checkbox"/> |             |
|                                       | Appetitlosigkeit                                         | <input type="checkbox"/> | <input type="checkbox"/> |             |
|                                       | Verstopfungen                                            | <input type="checkbox"/> | <input type="checkbox"/> |             |
|                                       | Aufgeblähtes Gefühl                                      | <input type="checkbox"/> | <input type="checkbox"/> |             |
|                                       | Reflux                                                   | <input type="checkbox"/> | <input type="checkbox"/> |             |
|                                       | Unwohlsein                                               | <input type="checkbox"/> | <input type="checkbox"/> |             |
|                                       | Veränderter Geschmack                                    | <input type="checkbox"/> | <input type="checkbox"/> |             |
|                                       | Mundtrockenheit                                          | <input type="checkbox"/> | <input type="checkbox"/> |             |
|                                       | Veränderung der Beschaffenheit oder Verfärbung der Zunge | <input type="checkbox"/> | <input type="checkbox"/> |             |
| Haut                                  | Ausschlag                                                | <input type="checkbox"/> | <input type="checkbox"/> |             |
|                                       | Schwellungen                                             | <input type="checkbox"/> | <input type="checkbox"/> |             |
|                                       | Juckreiz                                                 | <input type="checkbox"/> | <input type="checkbox"/> |             |
|                                       | Photosensibilität                                        | <input type="checkbox"/> | <input type="checkbox"/> |             |
|                                       | Veränderung von Haut- oder Haarbeschaffenheit            | <input type="checkbox"/> | <input type="checkbox"/> |             |
|                                       | Orale/ Vaginale Candida Mukositis                        | <input type="checkbox"/> | <input type="checkbox"/> |             |
|                                       | Trockene Haut                                            | <input type="checkbox"/> | <input type="checkbox"/> |             |
| Nervensystem                          | Fatigue (Müdigkeit)                                      | <input type="checkbox"/> | <input type="checkbox"/> |             |
|                                       | Neuropathie, Parästhesie (Missempfindungen)              | <input type="checkbox"/> | <input type="checkbox"/> |             |
|                                       | Symptome einer Depression                                | <input type="checkbox"/> | <input type="checkbox"/> |             |
|                                       | Schwindel                                                | <input type="checkbox"/> | <input type="checkbox"/> |             |
|                                       | Sehstörungen                                             | <input type="checkbox"/> | <input type="checkbox"/> |             |
|                                       | Kopfschmerzen                                            | <input type="checkbox"/> | <input type="checkbox"/> |             |
|                                       | Gedächtnisstörungen                                      | <input type="checkbox"/> | <input type="checkbox"/> |             |
|                                       | Verwirrtheit                                             | <input type="checkbox"/> | <input type="checkbox"/> |             |
| Niere                                 | Niereninsuffizienz                                       | <input type="checkbox"/> | <input type="checkbox"/> |             |
| Hämatogen/ Blut                       | Anämie                                                   | <input type="checkbox"/> | <input type="checkbox"/> |             |
|                                       | Leukopenie                                               | <input type="checkbox"/> | <input type="checkbox"/> |             |
| Leber                                 | Hepatitis (Leberfunktionsstörung)                        | <input type="checkbox"/> | <input type="checkbox"/> |             |
| Sonstiges                             | Gewichtszunahme                                          | <input type="checkbox"/> | <input type="checkbox"/> |             |
|                                       | Gewichtsverlust                                          | <input type="checkbox"/> | <input type="checkbox"/> |             |
|                                       | Myalgie und/oder Arthralgie (Muskel-/ Gelenkschmerzen)   | <input type="checkbox"/> | <input type="checkbox"/> |             |
|                                       | Dyspnoe (Kurzatmigkeit)                                  | <input type="checkbox"/> | <input type="checkbox"/> |             |
|                                       | EKG-Veränderungen (QT-Zeit Verlängerung)                 | <input type="checkbox"/> | <input type="checkbox"/> |             |
