# Supplementary material for: Adverse events and tolerability of long-term suppressive antibiotic therapy for periprosthetic joint infection: a prospective cohort study
Source: Copernicus journal article supplement (doi:10.5194/jbji-11-267-2026), 2026-05-12
Supplement: Supplementary file [file jbji-11-267-2026-supplement-title-page.pdf › jbji-11-267-2026-supplement-title-page.pdf]

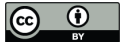

## *Supplement of*

# **Adverse events and tolerability of long-term suppressive antibiotic therapy for periprosthetic joint infection: a prospective cohort study**

**Pia Reinecke et al.**

*Correspondence to:* Sebastian Meller ([sebastian.meller@charite.de](mailto:sebastian.meller@charite.de))

- [jbji-11-267-2026-supplement-title-page.pdf](#)
- [JBJI\\_Supplement\\_S1\\_Tables.pdf](#)
- [JBJI\\_Supplement\\_S2\\_Questionnaire.pdf](#)

The copyright of individual parts of the supplement might differ from the article licence.
